# Supplementary material
Source: publisher site journal article supplement (https://www.spandidos-publications.com/1371/downloadSupplementary)

Figure S1. Downregulation of HSulf-1 promotes retinoblasma-positive triple-negative breast cancer cell proliferation, migration and invasion. (A) Western blotting was performed to measure HSulf-1 protein levels in Hs578T and MDA-MB-231 cells after transfection with the indicated plasmid psi-H1-vector or HSulf-1-shRNA.  $\beta$ -actin was used as the internal control. (B) Cell Counting Kit-8 and (C) colony formation assays were performed to evaluate cell proliferation 48 h after transfection with the psi-H1-vector or HSulf-1-shRNA. (D) Transwell and (E) wound healing assays were performed to evaluate cell invasion and migration 48 h after transfection with the psi-H1-vector or HSulf-1-shRNA. The results were derived from three independent experiments. Magnification,  $\times 100$ . Data are presented as the mean  $\pm$  SD. \* $P < 0.05$ . sh, short-hairpin RNA; NC, negative control; HSulf-1, human sulfatase 1; OD, optical density.

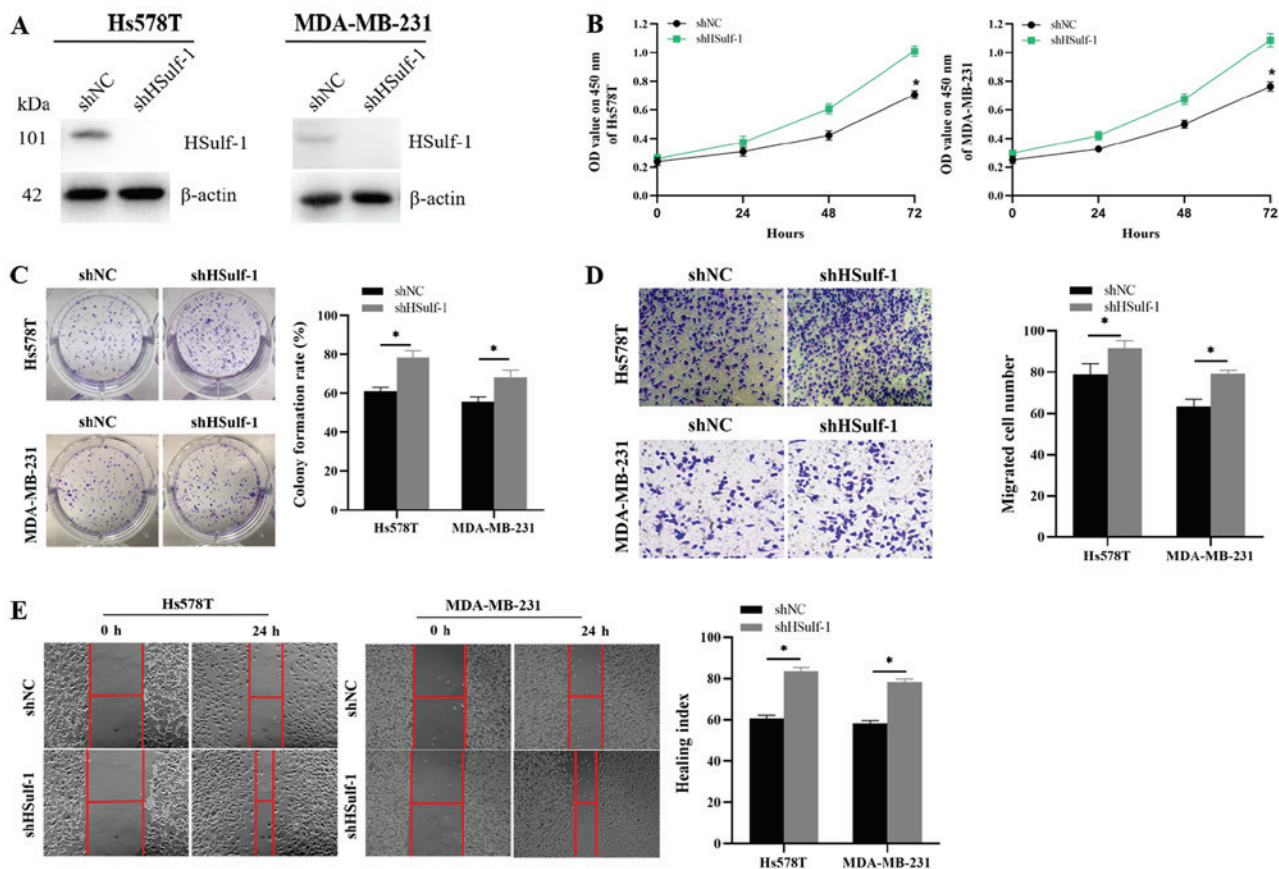

Supplement: Supplementary file 1 [file downloadSupplementary]
